# Supplementary material for: Resilience to Climate-Induced Disasters and Its Overall Relationship to Well-Being in Southern Africa: A Mixed-Methods Systematic Review
Source: Int J Environ Res Public Health. 2018 Oct 26;15(11):2375. doi: 10.3390/ijerph15112375 (PMC6267582; doi:10.3390/ijerph15112375)
Supplement: Supplementary file 1 [file ijerph-15-02375-s001.pdf]

**Table S1.** The PRISMA checklist.

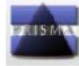

## PRISMA 2009 Checklist

| Section/topic                      | #  | Checklist item                                                                                                                                                                                                                                                                                              | Reported on page # |
|------------------------------------|----|-------------------------------------------------------------------------------------------------------------------------------------------------------------------------------------------------------------------------------------------------------------------------------------------------------------|--------------------|
| <b>TITLE</b>                       |    |                                                                                                                                                                                                                                                                                                             |                    |
| Title                              | 1  | Identify the report as a systematic review, meta-analysis, or both.                                                                                                                                                                                                                                         | 1                  |
| <b>ABSTRACT</b>                    |    |                                                                                                                                                                                                                                                                                                             |                    |
| Structured summary                 | 2  | Provide a structured summary including, as applicable: background; objectives; data sources; study eligibility criteria, participants, and interventions; study appraisal and synthesis methods; results; limitations; conclusions and implications of key findings; systematic review registration number. | 1                  |
| <b>INTRODUCTION</b>                |    |                                                                                                                                                                                                                                                                                                             |                    |
| Rationale                          | 3  | Describe the rationale for the review in the context of what is already known.                                                                                                                                                                                                                              | 2-3                |
| Objectives                         | 4  | Provide an explicit statement of questions being addressed with reference to participants, interventions, comparisons, outcomes, and study design (PICOS).                                                                                                                                                  | 4                  |
| <b>METHODS</b>                     |    |                                                                                                                                                                                                                                                                                                             |                    |
| Protocol and registration          | 5  | Indicate if a review protocol exists, if and where it can be accessed (e.g., Web address), and, if available, provide registration information including registration number.                                                                                                                               | 5                  |
| Eligibility criteria               | 6  | Specify study characteristics (e.g., PICOS, length of follow-up) and report characteristics (e.g., years considered, language, publication status) used as criteria for eligibility, giving rationale.                                                                                                      | 7                  |
| Information sources                | 7  | Describe all information sources (e.g., databases with dates of coverage, contact with study authors to identify additional studies) in the search and date last searched.                                                                                                                                  | 6                  |
| Search                             | 8  | Present full electronic search strategy for at least one database, including any limits used, such that it could be repeated.                                                                                                                                                                               | 6                  |
| Study selection                    | 9  | State the process for selecting studies (i.e., screening, eligibility, included in systematic review, and, if applicable, included in the meta-analysis).                                                                                                                                                   | 7                  |
| Data collection process            | 10 | Describe method of data extraction from reports (e.g., piloted forms, independently, in duplicate) and any processes for obtaining and confirming data from investigators.                                                                                                                                  | 7- 8               |
| Data items                         | 11 | List and define all variables for which data were sought (e.g., PICOS, funding sources) and any assumptions and simplifications made.                                                                                                                                                                       | 7                  |
| Risk of bias in individual studies | 12 | Describe methods used for assessing risk of bias of individual studies (including specification of whether this was done at the study or outcome level), and how this information is to be used in any data synthesis.                                                                                      | 8-9                |
| Summary measures                   | 13 | State the principal summary measures (e.g., risk ratio, difference in means).                                                                                                                                                                                                                               | N/A                |
| Synthesis of results               | 14 | Describe the methods of handling data and combining results of studies, if done, including measures of consistency (e.g., $I^2$ ) for each meta-analysis.                                                                                                                                                   | 9-10               |

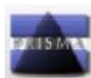

## PRISMA 2009 Checklist

| Section/topic                 | #  | Checklist item                                                                                                                                                                                           | Reported on page # |
|-------------------------------|----|----------------------------------------------------------------------------------------------------------------------------------------------------------------------------------------------------------|--------------------|
| Risk of bias across studies   | 15 | Specify any assessment of risk of bias that may affect the cumulative evidence (e.g., publication bias, selective reporting within studies).                                                             | 8-9                |
| Additional analyses           | 16 | Describe methods of additional analyses (e.g., sensitivity or subgroup analyses, meta-regression), if done, indicating which were pre-specified.                                                         | N/A                |
| <b>RESULTS</b>                |    |                                                                                                                                                                                                          |                    |
| Study selection               | 17 | Give numbers of studies screened, assessed for eligibility, and included in the review, with reasons for exclusions at each stage, ideally with a flow diagram.                                          | 5                  |
| Study characteristics         | 18 | For each study, present characteristics for which data were extracted (e.g., study size, PICOS, follow-up period) and provide the citations.                                                             | 11-14              |
| Risk of bias within studies   | 19 | Present data on risk of bias of each study and, if available, any outcome level assessment (see item 12).                                                                                                | 8-9                |
| Results of individual studies | 20 | For all outcomes considered (benefits or harms), present, for each study: (a) simple summary data for each intervention group (b) effect estimates and confidence intervals, ideally with a forest plot. | 16-25              |
| Synthesis of results          | 21 | Present results of each meta-analysis done, including confidence intervals and measures of consistency.                                                                                                  | N/A                |
| Risk of bias across studies   | 22 | Present results of any assessment of risk of bias across studies (see Item 15).                                                                                                                          | 9-10               |
| Additional analysis           | 23 | Give results of additional analyses, if done (e.g., sensitivity or subgroup analyses, meta-regression [see Item 16]).                                                                                    | N/A                |
| <b>DISCUSSION</b>             |    |                                                                                                                                                                                                          |                    |
| Summary of evidence           | 24 | Summarize the main findings including the strength of evidence for each main outcome; consider their relevance to key groups (e.g., healthcare providers, users, and policy makers).                     | 16-25              |
| Limitations                   | 25 | Discuss limitations at study and outcome level (e.g., risk of bias), and at review-level (e.g., incomplete retrieval of identified research, reporting bias).                                            | 30-31              |
| Conclusions                   | 26 | Provide a general interpretation of the results in the context of other evidence, and implications for future research.                                                                                  | 32                 |
| <b>FUNDING</b>                |    |                                                                                                                                                                                                          |                    |
| Funding                       | 27 | Describe sources of funding for the systematic review and other support (e.g., supply of data); role of funders for the systematic review.                                                               | 34                 |

From: Moher D, Liberati A, Tetzlaff J, Altman DG, The PRISMA Group (2009). Preferred Reporting Items for Systematic Reviews and Meta-Analyses: The PRISMA Statement. PLoS Med 6(7): e1000097. doi:10.1371/journal.pmed1000097

For more information, visit: [www.prisma-statement.org](http://www.prisma-statement.org).

**Table S2.** Quality assessment of qualitative studies based on JBIQARI.

| Criteria                                                                                                                                        | Author [Year]                |                             |                          |                              |                            |                            |
|-------------------------------------------------------------------------------------------------------------------------------------------------|------------------------------|-----------------------------|--------------------------|------------------------------|----------------------------|----------------------------|
|                                                                                                                                                 | Rankoana et al. (2016)a [51] | Van Riet et al. (2012) [52] | Vogel et al. (2010) [13] | Rankoana et al. (2016)b [53] | Ngwenya et al. (2016) [54] | Newsham et al. (2011) [55] |
| Is there congruity between the stated philosophical perspective and the research methodology?                                                   | Yes                          | Yes                         | Yes                      | Yes                          | Yes                        | Yes                        |
| Is there congruity between the research methodology and the research question or objectives?                                                    | Yes                          | Yes                         | Yes                      | Yes                          | Yes                        | Yes                        |
| Is there congruity between the research methodology and the methods used to collect data?                                                       | Yes                          | Yes                         | Yes                      | Yes                          | Yes                        | Yes                        |
| Is there congruity between the research methodology and the representation and analysis of data?                                                | Yes                          | Yes                         | Yes                      | Yes                          | Yes                        | C/D                        |
| Is there congruity between the research methodology and the interpretation of results?                                                          | Yes                          | Yes                         | Yes                      | Yes                          | Yes                        | Yes                        |
| Is there a statement locating the researcher culturally or theoretically?                                                                       | No                           | No                          | Yes                      | Yes                          | No                         | Yes                        |
| Is the influence of the researcher on the research, and vice- versa, addressed?                                                                 | C/D                          | Yes                         | No                       | Yes                          | Yes                        | No                         |
| Are participants, and their voices, adequately represented?                                                                                     | No                           | Yes                         | Yes                      | Yes                          | Yes                        | Yes                        |
| Is the research ethical according to current criteria or, for recent studies, and is there evidence of ethical approval by an appropriate body? | Yes                          | No                          | No                       | No                           | No                         | No                         |
| Do the conclusions drawn in the research report flow from the analysis, or interpretation, of the data?                                         | Yes                          | Yes                         | Yes                      | Yes                          | Yes                        | Yes                        |
| Overall points<br>Quality rating                                                                                                                | 7<br><b>Medium</b>           | 8<br><b>High</b>            | 8<br><b>Medium</b>       | 9<br><b>High</b>             | 8<br><b>High</b>           | 7<br><b>Medium</b>         |

N/A = Not Applicable; CD = Cannot Determine; Yes = 1 point; No = 0 point; N/A = 0 point; CD = 0 point; Rating: High = 8-10 points; Medium = 5-7 points; Low = <4 points

**Table S3.** Quality assessment for grey literature based on AACODS.

| Dimension | Criteria                                                                                                                                               | Author [Year]                 |                             |                             |
|-----------|--------------------------------------------------------------------------------------------------------------------------------------------------------|-------------------------------|-----------------------------|-----------------------------|
|           |                                                                                                                                                        | Renzaho et al.<br>(2016) [14] | Akpalu et al.<br>(2005)[64] | Hudson et al.<br>(2002)[65] |
| Authority | <b>Individual author</b>                                                                                                                               |                               |                             |                             |
|           | Author associated with a reputable organisation                                                                                                        | Yes                           | No                          | No                          |
|           | Author has professional qualification or considerable experience                                                                                       | Yes                           | No                          | No                          |
|           | Author has produced or published other work in the field                                                                                               | Yes                           | No                          | No                          |
|           | Author is a recognised expert, identified in other sources                                                                                             | Yes                           | No                          | No                          |
|           | Cited by others                                                                                                                                        | Yes                           | No                          | No                          |
|           | Is a higher degree student under expert supervision                                                                                                    | N/A                           | Yes                         | Yes                         |
|           | <b>Host Institution</b>                                                                                                                                |                               |                             |                             |
|           | Host institution is repeatable                                                                                                                         | Yes                           | Yes                         | Yes                         |
|           | Host institution is an authority in the field                                                                                                          | Yes                           | Yes                         | Yes                         |
|           | <b>All cases</b>                                                                                                                                       |                               |                             |                             |
|           | Detailed referencing list or bibliography                                                                                                              | Yes                           | Yes                         | Yes                         |
|           | <b>Dimension points scored</b>                                                                                                                         | <b>8/9</b>                    | <b>3/9</b>                  | <b>3/9</b>                  |
| Accuracy  | Item has clearly stated aim or brief                                                                                                                   | Yes                           | Yes                         | Yes                         |
|           | If so, was the aim met?                                                                                                                                | Yes                           | Yes                         | Yes                         |
|           | Has stated methodology                                                                                                                                 | Yes                           | Yes                         | Yes                         |
|           | Methodology was adhered to                                                                                                                             | Yes                           | Yes                         | Yes                         |
|           | Has been peer-reviewed                                                                                                                                 | No                            | No                          | No                          |
|           | Edited by a reputable authority                                                                                                                        | Yes                           | No                          | C/D                         |
|           | Supported by authoritative, documented references or credible sources                                                                                  | Yes                           | Yes                         | Yes                         |
|           | Is representative of work in the field; if not is it a valid counterbalance?                                                                           | Yes                           | No                          | No                          |
|           | Data collection is explicit and appropriate for the research                                                                                           | Yes                           | No                          | Yes                         |
|           | If item is secondary material (e.g. policy brief or technical report), does it refer to original?                                                      | N/A                           | N/A                         | N/A                         |
|           | Accurate and unbiased interpretation or analysis                                                                                                       | Yes                           | No                          | Yes                         |
|           | <b>Dimension points scored</b>                                                                                                                         | <b>9/11</b>                   | <b>5/11</b>                 | <b>7/11</b>                 |
| Coverage  | Refers to a particular population, designed to answer a particular question or based on statistics from a particular survey with limits clearly stated | Yes                           | Yes                         | Yes                         |

|                        |                                                                      |                             |                               |                               |
|------------------------|----------------------------------------------------------------------|-----------------------------|-------------------------------|-------------------------------|
|                        | <b>Dimension points scored</b>                                       | <b>1/1</b>                  | <b>1/1</b>                    | <b>1/1</b>                    |
| Objectivity            | Has clarity of author's stand point                                  | Yes                         | No                            | Yes                           |
|                        | Work balanced in presentation                                        | Yes                         | No                            | Yes                           |
|                        | <b>Dimension points scored</b>                                       | <b>2/2</b>                  | <b>0/2</b>                    | <b>2/2</b>                    |
| Date                   | Study date clearly stated or can be ascertained                      | Yes                         | No                            | Yes                           |
|                        | Includes contemporary material                                       | Yes                         | Yes                           | Yes                           |
|                        | <b>Dimension points scored</b>                                       | <b>2/2</b>                  | <b>1/2</b>                    | <b>2/2</b>                    |
| Significance           | Item is meaningful (incorporates feasibility, utility and relevance) | Yes                         | Yes                           | Yes                           |
|                        | Does it add to context?                                              | Yes                         | Yes                           | Yes                           |
|                        | Enriches or adds something unique to research                        | Yes                         | Yes                           | Yes                           |
|                        | Strengthens or refutes current position                              | Yes                         | Yes                           | Yes                           |
|                        | Research area would be lesser without it                             | Yes                         | C/D                           | Yes                           |
|                        | Is it integral, representative or typical?                           | Yes                         | Yes                           | Yes                           |
|                        | Has impact (influential to others' work or behaviour)                | Yes                         | C/D                           | Yes                           |
|                        | <b>Dimension points scored</b>                                       | <b>7/7</b>                  | <b>5/7</b>                    | <b>7/7</b>                    |
| Total points<br>Rating |                                                                      | <b>29/32</b><br><b>High</b> | <b>15/32</b><br><b>Medium</b> | <b>22/32</b><br><b>Medium</b> |

N/A = Not Applicable; CD = Cannot Determine; Yes = 1 point; No = 0 point; N/A = 0 point; CD = 0 point; Rating: High = >24-32 points; Medium= 15-22 points; Low= <14 points

**Table S4.** Quality of peer-reviewed studies included based on NIH quality assessment checklist.

| Criteria                                                                                                                                                                                                                        | Author [Year]            |                           |                            |                             |                          |                           |                           |                           |                            |                          |
|---------------------------------------------------------------------------------------------------------------------------------------------------------------------------------------------------------------------------------|--------------------------|---------------------------|----------------------------|-----------------------------|--------------------------|---------------------------|---------------------------|---------------------------|----------------------------|--------------------------|
|                                                                                                                                                                                                                                 | Bahta et al. (2016) [56] | Bareki et al. (2017) [57] | Bunting et al. (2013) [58] | Kolawole et al. (2016) [59] | Belle et al. (2015) [60] | Thomas et al. (2007) [61] | Mlenga et al. (2015) [62] | Mlenga et al. (2016) [63] | Shongwe et al. (2014) [66] | Mason et al. (2005) [67] |
| Study objectives or research question clearly stated                                                                                                                                                                            | Yes                      | Yes                       | CD                         | Yes                         | Yes                      | Yes                       | Yes                       | Yes                       | Yes                        | Yes                      |
| Study population clearly specified and defined                                                                                                                                                                                  | Yes                      | Yes                       | Yes                        | Yes                         | Yes                      | Yes                       | Yes                       | Yes                       | Yes                        | Yes                      |
| Participation rate of eligible persons at least 50%?                                                                                                                                                                            | Yes                      | Yes                       | Yes                        | Yes                         | Yes                      | No                        | Yes                       | Yes                       | Yes                        | Yes                      |
| Participants selected or recruited from the same or similar populations (including the same time period?) Were inclusion and exclusion criteria for being in the study pre-specified and applied uniformly to all participants? | Yes                      | Yes                       | Yes                        | Yes                         | Yes                      | No                        | Yes                       | Yes                       | Yes                        | Yes                      |
| Was a sample size justification, power description, or variance and effect estimates provided?                                                                                                                                  | No                       | No                        | CD                         | Yes                         | Yes                      | No                        | Yes                       | Yes                       | Yes                        | CD                       |
| Exposure(s) measured before the outcomes(s) being measured                                                                                                                                                                      | No                       | No                        | No                         | No                          | No                       | Yes                       | No                        | No                        | No                         | Yes                      |
| Time frame sufficient to observe association between exposure and outcome                                                                                                                                                       | No                       | No                        | No                         | No                          | No                       | Yes                       | No                        | No                        | No                         | Yes                      |
| For the exposure, did the study examine different levels of the exposure as related to the outcome                                                                                                                              | No                       | No                        | Yes                        | Yes                         | Yes                      | Yes                       | Yes                       | Yes                       | Yes                        | Yes                      |
| Exposure measures (Independent variables) clearly defined, valid, reliable, and implemented consistently across all study participants                                                                                          | Yes                      | Yes                       | Yes                        | Yes                         | Yes                      | Yes                       | Yes                       | Yes                       | Yes                        | Yes                      |
| Exposure(s) measured more than once over the time                                                                                                                                                                               | N/A                      | N/A                       | N/A                        | N/A                         | N/A                      | Yes                       | N/A                       | N/A                       | N/A                        | Yes                      |
| Outcome measures (dependent variables) clearly defined, valid, reliable, and implemented consistently across all study participants                                                                                             | Yes                      | Yes                       | Yes                        | Yes                         | Yes                      | Yes                       | Yes                       | Yes                       | Yes                        | Yes                      |
| Outcome assessors blinded to the exposure status of participants                                                                                                                                                                | N/A                      | N/A                       | N/A                        | N/A                         | N/A                      | N/A                       | N/A                       | N/A                       | N/A                        | N/A                      |
| Loss to follow-up after baseline 20% or less                                                                                                                                                                                    | N/A                      | N/A                       | N/A                        | N/A                         | N/A                      | N/A                       | N/A                       | N/A                       | N/A                        | CD                       |
| Potential confounding variables measured and adjusted statistically for their impact on the relationship between exposure(s) and outcome(s)                                                                                     | N/A                      | No                        | Yes                        | Yes                         | Yes                      | No                        | Yes                       | No                        | Yes                        | Yes                      |
| Overall points                                                                                                                                                                                                                  | 6                        | 6                         | 7                          | 9                           | 9                        | 8                         | 9                         | 8                         | 9                          | 11                       |
| Quality rating                                                                                                                                                                                                                  | Fair                     | Fair                      | Fair                       | Fair                        | Fair                     | Fair                      | Fair                      | Fair                      | Fair                       | Good                     |

N/A = Not Applicable; CD = Cannot Determine; Yes = 1 point; No = 0 point; N/A = 0 point; CD = 0 point; Rating: Very good = >13 points; Good = 10-13 points; Fair = 5 – 9 points; Poor = <4 points.

**Table S5.** Rating of scales based on framework by Cyril and colleagues.

| Content Validity                      |                  |                 | Reliability                        |                                         |                                                   | Criterion validity                            | Construct validity                                                                                                               | Total Psychometric properties |
|---------------------------------------|------------------|-----------------|------------------------------------|-----------------------------------------|---------------------------------------------------|-----------------------------------------------|----------------------------------------------------------------------------------------------------------------------------------|-------------------------------|
| Was the tool development informed by: |                  |                 | Tool reviewed by target population | Internal consistency (Cronbach’s alpha) | Test-retest (intra-class correlation coefficient) |                                               | EFA & CFA                                                                                                                        | Total maximum score =17       |
| Literature review                     | Panel of experts | Empirical study |                                    |                                         |                                                   | yes=1 point                                   | <0.50=unacceptable (0 point)                                                                                                     | <0.40—poor. (0 point)         |
| no=0 point                            | no=0 point       | no=0 point      | no=0 point                         | ≥0.50 and <0.70 =poor (1 point)         | ≥0.40 and <0.60=fair (1 point)                    | 0.30=a weak linear relationship (1 point)     | each extracted factor has at least 3 items (yes=1 point, no=0 point)                                                             | 5-9 points acceptable         |
|                                       |                  |                 |                                    | ≥70 and <0.80= acceptable (2 points)    | ≥0.60 and <0.75= good (2 points)                  | 0.50=a moderate relationship (2 points)       | each variable loads strongly on only one factor (≥0.35) and has two or more strong loadings (≥0.70) (yes=1 point and no=0 point) | 10-13 points good             |
|                                       |                  |                 |                                    | ≥0.80=good (3 points).                  | ≥75= very good (3 points)                         | ≥0.70=a strong linear relationship (3 points) | factor analysis was based on at least 10 cases per variable (yes=1 point and no= 0 point)                                        | >13 very good                 |
